# Supplementary material for: Post-Diagnostic Support for Behaviour Changes in Young-Onset Dementia in Australia
Source: MDPI journal article supplement (doi:10.3390/brainsci13111529), 2023-10-30
Supplement: s1 [file s1]

**Supplementary material:** Post-diagnostic support for behaviour changes in young-onset dementia in Australia

Claire J. Cadwallader, Dennis Velakoulis, Samantha M. Loi

**Contents**

**Supplementary methods (pp. 2-15)**

Questionnaire items

**Supplementary results (pp. 16)**

GP support satisfaction ratings (Figure S1).

Emergency support satisfaction ratings (Figure S2).

Private specialist satisfaction ratings (Figure S3)

Adult mental health service satisfaction ratings (Figure S4)

Older adult mental health service satisfaction ratings (Figure S5)

Dementia Services Australia satisfaction ratings (Figure S6)

## Supplementary methods

Table S1. Questionnaire items

The following survey was designed within the platform RedCAP and includes branching logic, such that the questions participants answer depend on their responses to preceding questions. The following copy of the survey displays all possible questions and does not show the branching logic.

The bullet points below explain the main functions of the branching logic:

- Participants with younger-onset dementia (YOD) were not required to complete the Neuropsychiatric Inventory Questionnaire (NPI-Q) as this is a proxy measure designed to be filled out by caregivers.
- Healthcare practitioners and paid support workers/coordinators working for an organisation that supports people with YOD were not required to answer questions about specific details of a YOD diagnosis or the NPI-Q as they were likely to be working with multiple people who have YOD. They were still asked about the specific types of behaviour changes they needed support for.
- In the 'Satisfaction' section of the survey, participants were asked to rate their satisfaction for only those services that they selected as having provided them with support for the behaviour changes.

|                                                                                                               |                                                                                                                                                                                                                                                                                                                                                                                                                                                                                                                                                                                                                                                                                                                                                                                                                                                                                                                      |
|---------------------------------------------------------------------------------------------------------------|----------------------------------------------------------------------------------------------------------------------------------------------------------------------------------------------------------------------------------------------------------------------------------------------------------------------------------------------------------------------------------------------------------------------------------------------------------------------------------------------------------------------------------------------------------------------------------------------------------------------------------------------------------------------------------------------------------------------------------------------------------------------------------------------------------------------------------------------------------------------------------------------------------------------|
| Are you a person who is living with younger-onset dementia (a dementia with symptom onset at < 65 years old)? | <input type="radio"/> Yes<br><input type="radio"/> No                                                                                                                                                                                                                                                                                                                                                                                                                                                                                                                                                                                                                                                                                                                                                                                                                                                                |
| Are you (main role):                                                                                          | <input type="radio"/> A family carer/support person (unpaid/informal) living with someone who has younger-onset dementia (YOD)<br><input type="radio"/> Healthcare practitioner (paid/formal) working in the community who looks after a person with younger-onset dementia (YOD)<br><input type="radio"/> Healthcare practitioner (paid/formal) working in a residential care facility who looks after someone with younger-onset dementia (YOD)<br><input type="radio"/> A paid carer working in the community who looks after a person with younger-onset dementia (YOD)<br><input type="radio"/> A paid carer working in a residential care facility who looks after a person with younger-onset dementia (YOD)<br><input type="radio"/> A paid support worker/coordinator working for an organisation (e.g Dementia Australia, Huntington's Vic etc) that looks after someone with younger-onset dementia (YOD) |
| Is your professional role                                                                                     | <input type="radio"/> Medical<br><input type="radio"/> Nursing<br><input type="radio"/> Allied health<br><input type="radio"/> Personal care attendant<br><input type="radio"/> Other                                                                                                                                                                                                                                                                                                                                                                                                                                                                                                                                                                                                                                                                                                                                |
| Is your role supporting a person with YOD part of the National Disability Insurance Scheme (NDIS)?            | <input type="radio"/> Yes<br><input type="radio"/> No<br><input type="radio"/> Maybe/Not sure                                                                                                                                                                                                                                                                                                                                                                                                                                                                                                                                                                                                                                                                                                                                                                                                                        |
| Do you have a package by the National Disability Insurance Scheme (NDIS)?                                     | <input type="radio"/> Yes<br><input type="radio"/> No<br><input type="radio"/> We/I have made an NDIS access request and I'm awaiting my planning meeting<br><input type="radio"/> Our/my NDIS application was rejected<br><input type="radio"/> We/I have an aged care package<br><input type="radio"/> I don't know                                                                                                                                                                                                                                                                                                                                                                                                                                                                                                                                                                                                |
| What is your current age?                                                                                     | _____                                                                                                                                                                                                                                                                                                                                                                                                                                                                                                                                                                                                                                                                                                                                                                                                                                                                                                                |
| What is your gender?                                                                                          | <input type="radio"/> Identify as a woman<br><input type="radio"/> Identify as a man<br><input type="radio"/> Identify as non-binary<br><input type="radio"/> Prefer not to say                                                                                                                                                                                                                                                                                                                                                                                                                                                                                                                                                                                                                                                                                                                                      |
| Which state or territory do you live                                                                          | <input type="radio"/> Vic<br><input type="radio"/> NSW<br><input type="radio"/> Queensland<br><input type="radio"/> South Australia<br><input type="radio"/> Western Australia<br><input type="radio"/> ACT<br><input type="radio"/> Tasmania<br><input type="radio"/> Northern Territory                                                                                                                                                                                                                                                                                                                                                                                                                                                                                                                                                                                                                            |
| What is your living situation                                                                                 | <input type="radio"/> Live alone<br><input type="radio"/> Live with family/partner<br><input type="radio"/> Live in shared accommodation<br><input type="radio"/> Live in residential care facility<br><input type="radio"/> Other                                                                                                                                                                                                                                                                                                                                                                                                                                                                                                                                                                                                                                                                                   |

|                                                                                 |                                                                                                                                                                                                                                                                                                                                                                                                                                                                                                                  |
|---------------------------------------------------------------------------------|------------------------------------------------------------------------------------------------------------------------------------------------------------------------------------------------------------------------------------------------------------------------------------------------------------------------------------------------------------------------------------------------------------------------------------------------------------------------------------------------------------------|
| Do you live with the person with younger-onset dementia who you are caring for? | <input type="radio"/> Yes<br><input type="radio"/> No - they live in a residential care facility<br><input type="radio"/> No - they live in Specialist Disability Accommodation, SDA (specialist designed housing for people with high intensity needs)<br><input type="radio"/> No - they live in Supported Independent Living, SIL (housing with onsite supports and daily living services for support)<br><input type="radio"/> No - I am unsure whether they live in SDA nor SIL but we do not live together |
| Is where you live                                                               | <input type="radio"/> Metropolitan/urban<br><input type="radio"/> Rural<br><input type="radio"/> Remote<br><input type="radio"/> Not sure                                                                                                                                                                                                                                                                                                                                                                        |
| Is the residential care facility you work at located in                         | <input type="radio"/> Metropolitan/urban<br><input type="radio"/> Rural<br><input type="radio"/> Remote<br><input type="radio"/> Not sure                                                                                                                                                                                                                                                                                                                                                                        |
| What is your postcode                                                           | _____                                                                                                                                                                                                                                                                                                                                                                                                                                                                                                            |
| What is the postcode of where you work                                          | _____                                                                                                                                                                                                                                                                                                                                                                                                                                                                                                            |

Page 1

## Details of younger-onset dementia

Please complete the survey below.

Thank you!

|                                                                                                                                          |                                                                                                                                                                                                                                                                                                                                                                                                                                                                                                                                                                                                                               |
|------------------------------------------------------------------------------------------------------------------------------------------|-------------------------------------------------------------------------------------------------------------------------------------------------------------------------------------------------------------------------------------------------------------------------------------------------------------------------------------------------------------------------------------------------------------------------------------------------------------------------------------------------------------------------------------------------------------------------------------------------------------------------------|
| What is the type of younger-onset dementia?                                                                                              | <input type="checkbox"/> Alzheimer's<br><input type="checkbox"/> Posterior cortical atrophy<br><input type="checkbox"/> Frontotemporal dementia<br><input type="checkbox"/> Language variant dementia<br><input type="checkbox"/> Behavioural-variant dementia<br><input type="checkbox"/> Frontotemporal dementia with motor neuron disease<br><input type="checkbox"/> Vascular dementia<br><input type="checkbox"/> Alcohol-related dementia<br><input type="checkbox"/> Huntington's disease<br><input type="checkbox"/> Dementia with Lewy bodies<br><input type="checkbox"/> Other<br><input type="checkbox"/> Not sure |
| If you answered 'Other', what is the type of younger-onset dementia?                                                                     | _____                                                                                                                                                                                                                                                                                                                                                                                                                                                                                                                                                                                                                         |
| If you know, what was the age of onset of the younger-onset dementia, (i.e when did you first notice symptoms that could be a dementia)? | _____                                                                                                                                                                                                                                                                                                                                                                                                                                                                                                                                                                                                                         |
| If you know, what was the age of diagnosis of the younger-onset dementia?                                                                | _____                                                                                                                                                                                                                                                                                                                                                                                                                                                                                                                                                                                                                         |
| If you know, when was the diagnosis given? (Month/Year)                                                                                  | _____                                                                                                                                                                                                                                                                                                                                                                                                                                                                                                                                                                                                                         |
| If you know, who gave the diagnosis of younger-onset dementia?                                                                           | <input type="checkbox"/> GP<br><input type="checkbox"/> Psychiatrist<br><input type="checkbox"/> Neurologist<br><input type="checkbox"/> Geriatrician<br><input type="checkbox"/> Neuropsychologist<br><input type="checkbox"/> Nursing<br><input type="checkbox"/> Allied health<br><input type="checkbox"/> Other<br><input type="checkbox"/> Don't know                                                                                                                                                                                                                                                                    |

---

Have you noticed or has anyone else noticed, any behaviour changes since the onset of dementia, which you would like advice or support for?

- ☐ Yes  
☐ No

---

What types of behaviour changes associated with younger-onset dementia have you wanted support for?

- ☐ False beliefs such as thinking others are stealing things or planning to harm (delusions)  
☐ False visions or voices /seeing or hearing things that aren't there (hallucinations)  
☐ Resistive to help from others or hard to handle (agitation / aggression)  
☐ Feel/appear sad or depressed (depression)  
☐ Feel/appear upset when separated or nervous (anxiety)  
☐ Feel/appear too good or excessively happy (elation / euphoria)  
☐ Less interested in plans or usual activities (apathy / indifference)  
☐ Act impulsively or say things that might hurt other's feelings (disinhibition)  
☐ Act impatiently or cranky, difficulty coping with delays or waiting (Irritability /lability)  
☐ Have repetitive behaviours such as pacing, handling buttons or doing other things repeatedly (motor disturbance)  
☐ Wake during the night, get up too early in the morning or have excessive naps during the day (night time behaviours)  
☐ Have lost or gained weight or had a change in food preferences (appetite /eating changes)  
☐ Other

---

Have you sought help or support for the behaviour changes?

- ☐ Yes  
☐ No  
☐ Not sure

## NPI-Q and support received

Page 1

Please complete the survey below.

Thank you!

---

Were any of these behaviour changes present in the last month?

- ☐ False beliefs such as thinking others are stealing things or planning to harm them (delusions)  
☐ False visions or voices /seeing or hearing things that aren't there (hallucinations)  
☐ Resistive to help from others or hard to handle (agitation / aggression)  
☐ Appear sad or say they are depressed (depression)  
☐ Appear upset when separated or nervous (anxiety)  
☐ Appear too good or excessively happy (elation / euphoria)  
☐ Less interested in plans or usual activities (apathy / indifference)  
☐ Act impulsively or say things that might hurt other's feelings (disinhibition)  
☐ Act impatiently or cranky, difficulty coping with delays or waiting (Irritability /lability)  
☐ Have repetitive behaviours such as pacing, handling buttons or doing other things repeatedly (motor disturbance)  
☐ Wake during the night, get up too early in the morning or have excessive naps during the day (night time behaviours)  
☐ Have lost or gained weight or had a change in the food they like (appetite /eating changes)  
☐ Other

---

What is the severity of these delusions for the PERSON WITH YOUNGER-ONSET DEMENTIA?

- ☐ Mild - noticeable but not a significant change  
☐ Moderate - significant but not a dramatic change  
☐ Severe - marked or prominent change  
☐ No change  
☐ Don't know

|                                                                                              |                                                                                                                                                                                                                                                                                                                                                                                                                                                                                        |
|----------------------------------------------------------------------------------------------|----------------------------------------------------------------------------------------------------------------------------------------------------------------------------------------------------------------------------------------------------------------------------------------------------------------------------------------------------------------------------------------------------------------------------------------------------------------------------------------|
| How distressing do YOU find the delusions?                                                   | <input type="radio"/> Not distressing at all<br><input type="radio"/> Minimal - slightly distressing, not a problem to cope with<br><input type="radio"/> Mild - not very distressing, generally easy to cope with<br><input type="radio"/> Moderate - fairly distressing, not always easy to cope with<br><input type="radio"/> Severe - very distressing, difficult to cope with<br><input type="radio"/> Very severe - extremely distressing, unable to cope with                   |
| What is the severity of these hallucinations for the PERSON WITH YOUNGER-ONSET DEMENTIA?     | <input type="radio"/> Mild - noticeable but not a significant change<br><input type="radio"/> Moderate - significant but not a dramatic change<br><input type="radio"/> Severe - marked or prominent change<br><input type="radio"/> No change<br><input type="radio"/> Don't know                                                                                                                                                                                                     |
| How distressing do YOU find the hallucinations?                                              | <input type="radio"/> Not distressing at all<br><input type="radio"/> Minimal - slightly distressing, not a problem to cope with<br><input type="radio"/> Mild - not very distressing, generally easy to cope with<br><input type="radio"/> Moderate - fairly distressing, not always easy to cope with<br><input type="radio"/> Severe - very distressing, difficult to cope with<br><input type="radio"/> Very severe - extremely distressing, unable to cope with                   |
| What is the severity of the agitation/aggression for the PERSON WITH YOUNGER-ONSET DEMENTIA? | <input type="radio"/> Mild - noticeable but not a significant change<br><input type="radio"/> Moderate - significant but not a dramatic change<br><input type="radio"/> Severe - marked or prominent change<br><input type="radio"/> No change<br><input type="radio"/> Don't know                                                                                                                                                                                                     |
| How distressing do YOU find the agitation/aggression?                                        | <input type="radio"/> Not distressing at all<br><input type="radio"/> Minimal - slightly distressing, not a problem to cope with<br><input type="radio"/> Mild - not very distressing, generally easy to cope with<br><input type="radio"/> Moderate - fairly distressing, not always easy to cope with<br><input type="radio"/> Severe - very distressing, difficult to cope with<br><input type="radio"/> Very severe - extremely distressing, unable to cope with                   |
| What is the severity of depressed mood for the PERSON WITH YOUNGER-ONSET DEMENTIA?           | <input type="checkbox"/> Mild - noticeable but not a significant change<br><input type="checkbox"/> Moderate - significant but not a dramatic change<br><input type="checkbox"/> Severe - marked or prominent change<br><input type="checkbox"/> No change<br><input type="checkbox"/> Don't know                                                                                                                                                                                      |
| How distressing for YOU is the depressed mood?                                               | <input type="checkbox"/> Not distressing at all<br><input type="checkbox"/> Minimal - slightly distressing, not a problem to cope with<br><input type="checkbox"/> Mild - not very distressing, generally easy to cope with<br><input type="checkbox"/> Moderate - fairly distressing, not always easy to cope with<br><input type="checkbox"/> Severe - very distressing, difficult to cope with<br><input type="checkbox"/> Very severe - extremely distressing, unable to cope with |
| What is the severity of the anxiety for the PERSON WITH YOUNGER-ONSET DEMENTIA?              | <input type="radio"/> Mild - noticeable but not a significant change<br><input type="radio"/> Moderate - significant but not a dramatic change<br><input type="radio"/> Severe - marked or prominent change<br><input type="radio"/> No change<br><input type="radio"/> Don't know                                                                                                                                                                                                     |

|                                                                                               |                                                                                                                                                                                                                                                                                                                                                                                                                                                                      |
|-----------------------------------------------------------------------------------------------|----------------------------------------------------------------------------------------------------------------------------------------------------------------------------------------------------------------------------------------------------------------------------------------------------------------------------------------------------------------------------------------------------------------------------------------------------------------------|
| How distressing for YOU is the anxiety?                                                       | <input type="radio"/> Not distressing at all<br><input type="radio"/> Minimal - slightly distressing, not a problem to cope with<br><input type="radio"/> Mild - not very distressing, generally easy to cope with<br><input type="radio"/> Moderate - fairly distressing, not always easy to cope with<br><input type="radio"/> Severe - very distressing, difficult to cope with<br><input type="radio"/> Very severe - extremely distressing, unable to cope with |
| What is the severity of the elation/euphoria for the PERSON WITH YOUNGER-ONSET DEMENTIA?      | <input type="radio"/> Mild - noticeable but not a significant change<br><input type="radio"/> Moderate - significant but not a dramatic change<br><input type="radio"/> Severe - marked or prominent change<br><input type="radio"/> No change<br><input type="radio"/> Don't know                                                                                                                                                                                   |
| How distressing for YOU is the elation/euphoria?                                              | <input type="radio"/> Not distressing at all<br><input type="radio"/> Minimal - slightly distressing, not a problem to cope with<br><input type="radio"/> Mild - not very distressing, generally easy to cope with<br><input type="radio"/> Moderate - fairly distressing, not always easy to cope with<br><input type="radio"/> Severe - very distressing, difficult to cope with<br><input type="radio"/> Very severe - extremely distressing, unable to cope with |
| What is the severity of the apathy/indifference for the PERSON WITH YOUNGER-ONSET DEMENTIA?   | <input type="radio"/> Mild - noticeable but not a significant change<br><input type="radio"/> Moderate - significant but not a dramatic change<br><input type="radio"/> Severe - marked or prominent change<br><input type="radio"/> No change<br><input type="radio"/> Don't know                                                                                                                                                                                   |
| How distressing for YOU is the apathy/indifference?                                           | <input type="radio"/> Not distressing at all<br><input type="radio"/> Minimal - slightly distressing, not a problem to cope with<br><input type="radio"/> Mild - not very distressing, generally easy to cope with<br><input type="radio"/> Moderate - fairly distressing, not always easy to cope with<br><input type="radio"/> Severe - very distressing, difficult to cope with<br><input type="radio"/> Very severe - extremely distressing, unable to cope with |
| What is the severity of the disinhibition for the PERSON WITH YOUNGER-ONSET DEMENTIA?         | <input type="radio"/> Mild - noticeable but not a significant change<br><input type="radio"/> Moderate - significant but not a dramatic change<br><input type="radio"/> Severe - marked or prominent change<br><input type="radio"/> No change<br><input type="radio"/> Don't know                                                                                                                                                                                   |
| How distressing for YOU is the disinhibition?                                                 | <input type="radio"/> Not distressing at all<br><input type="radio"/> Minimal - slightly distressing, not a problem to cope with<br><input type="radio"/> Mild - not very distressing, generally easy to cope with<br><input type="radio"/> Moderate - fairly distressing, not always easy to cope with<br><input type="radio"/> Severe - very distressing, difficult to cope with<br><input type="radio"/> Very severe - extremely distressing, unable to cope with |
| What is the severity of the irritability/lability for the PERSON WITH YOUNGER-ONSET DEMENTIA? | <input type="radio"/> Mild - noticeable but not a significant change<br><input type="radio"/> Moderate - significant but not a dramatic change<br><input type="radio"/> Severe - marked or prominent change<br><input type="radio"/> No change<br><input type="radio"/> Don't know                                                                                                                                                                                   |

|                                                                                                 |                                                                                                                                                                                                                                                                                                                                                                                                                                                                      |
|-------------------------------------------------------------------------------------------------|----------------------------------------------------------------------------------------------------------------------------------------------------------------------------------------------------------------------------------------------------------------------------------------------------------------------------------------------------------------------------------------------------------------------------------------------------------------------|
| How distressing for YOU is the irritability/lability?                                           | <input type="radio"/> Not distressing at all<br><input type="radio"/> Minimal - slightly distressing, not a problem to cope with<br><input type="radio"/> Mild - not very distressing, generally easy to cope with<br><input type="radio"/> Moderate - fairly distressing, not always easy to cope with<br><input type="radio"/> Severe - very distressing, difficult to cope with<br><input type="radio"/> Very severe - extremely distressing, unable to cope with |
| What is the severity of the motor disturbance for the PERSON WITH YOUNGER-ONSET DEMENTIA?       | <input type="radio"/> Mild - noticeable but not a significant change<br><input type="radio"/> Moderate - significant but not a dramatic change<br><input type="radio"/> Severe - marked or prominent change<br><input type="radio"/> No change<br><input type="radio"/> Don't know                                                                                                                                                                                   |
| How distressing for YOU is the motor disturbance?                                               | <input type="radio"/> Not distressing at all<br><input type="radio"/> Minimal - slightly distressing, not a problem to cope with<br><input type="radio"/> Mild - not very distressing, generally easy to cope with<br><input type="radio"/> Moderate - fairly distressing, not always easy to cope with<br><input type="radio"/> Severe - very distressing, difficult to cope with<br><input type="radio"/> Very severe - extremely distressing, unable to cope with |
| What is the severity of the night-time behaviours for the PERSON WITH YOUNGER-ONSET DEMENTIA?   | <input type="radio"/> Mild - noticeable but not a significant change<br><input type="radio"/> Moderate - significant but not a dramatic change<br><input type="radio"/> Severe - marked or prominent change<br><input type="radio"/> No change<br><input type="radio"/> Don't know                                                                                                                                                                                   |
| How distressing for YOU are the night-time behaviours?                                          | <input type="radio"/> Not distressing at all<br><input type="radio"/> Minimal - slightly distressing, not a problem to cope with<br><input type="radio"/> Mild - not very distressing, generally easy to cope with<br><input type="radio"/> Moderate - fairly distressing, not always easy to cope with<br><input type="radio"/> Severe - very distressing, difficult to cope with<br><input type="radio"/> Very severe - extremely distressing, unable to cope with |
| What is the severity of the appetite/eating changes for the PERSON WITH YOUNGER-ONSET DEMENTIA? | <input type="radio"/> Mild - noticeable but not a significant change<br><input type="radio"/> Moderate - significant but not a dramatic change<br><input type="radio"/> Severe - marked or prominent change<br><input type="radio"/> No change<br><input type="radio"/> Don't know                                                                                                                                                                                   |
| How distressing for YOU are the appetite/eating changes?                                        | <input type="radio"/> Not distressing at all<br><input type="radio"/> Minimal - slightly distressing, not a problem to cope with<br><input type="radio"/> Mild - not very distressing, generally easy to cope with<br><input type="radio"/> Moderate - fairly distressing, not always easy to cope with<br><input type="radio"/> Severe - very distressing, difficult to cope with<br><input type="radio"/> Very severe - extremely distressing, unable to cope with |



|                                                                                                                                          |                                                                                                                                                                                                                                                                                                                                                                                                                                                                                                                                                                                                                                                                                                                                                                                                        |
|------------------------------------------------------------------------------------------------------------------------------------------|--------------------------------------------------------------------------------------------------------------------------------------------------------------------------------------------------------------------------------------------------------------------------------------------------------------------------------------------------------------------------------------------------------------------------------------------------------------------------------------------------------------------------------------------------------------------------------------------------------------------------------------------------------------------------------------------------------------------------------------------------------------------------------------------------------|
| In the last 12 months, were you able to access help to support you to manage these behaviour changes?                                    | <input type="radio"/> Yes<br><input type="radio"/> No<br><input type="radio"/> Not sure                                                                                                                                                                                                                                                                                                                                                                                                                                                                                                                                                                                                                                                                                                                |
| Who did you try to get help for the behaviour changes from?                                                                              | <input type="checkbox"/> General practitioner (GP)<br><input type="checkbox"/> Went to the Emergency Department<br><input type="checkbox"/> Called an ambulance<br><input type="checkbox"/> Private specialist (e.g private psychiatrist, private neurologist, private psychologist)<br><input type="checkbox"/> Adult mental health team (public)<br><input type="checkbox"/> Older adults/aged/older persons mental health team (public)<br><input type="checkbox"/> Dementia Australia<br><input type="checkbox"/> Dementia Services Australia (DSA)/Dementia Behaviour Management Advisory Services/Severe Behaviour Response Team<br><input type="checkbox"/> Other<br><input type="checkbox"/> Not sure                                                                                          |
| Who actually provided you with help for the behaviour changes?                                                                           | <input type="checkbox"/> General practitioner (GP)<br><input type="checkbox"/> Went to the Emergency Department<br><input type="checkbox"/> Called an ambulance<br><input type="checkbox"/> Private specialist (e.g private psychiatrist, private neurologist, private psychologist)<br><input type="checkbox"/> Adult mental health team (public-funded service for adults, 18-65 years old)<br><input type="checkbox"/> Older adults/aged/older persons mental health team (public-funded service for adults aged > 65 years old)<br><input type="checkbox"/> Dementia Australia<br><input type="checkbox"/> Dementia Services Australia (DSA)/Dementia Behaviour Management Advisory Services/Severe Behaviour Response Team<br><input type="checkbox"/> Other<br><input type="checkbox"/> Not sure |
| How long did it take before you were able to get help for these behaviour changes?                                                       | <input type="radio"/> Within 1 week<br><input type="radio"/> 1-2 weeks<br><input type="radio"/> Within 1 month<br><input type="radio"/> Within 3 months<br><input type="radio"/> Within 6 months<br><input type="radio"/> Longer than 6 months<br><input type="radio"/> I am still waiting to get support<br><input type="radio"/> I was declined support from the service/s                                                                                                                                                                                                                                                                                                                                                                                                                           |
| Please add here any details of any other support services that you found helpful in providing advice or managing these behaviour changes |                                                                                                                                                                                                                                                                                                                                                                                                                                                                                                                                                                                                                                                                                                                                                                                                        |
| What form of support did you receive for the behaviour changes?                                                                          | <input type="checkbox"/> I spoke to someone on the phone and they gave me advice<br><input type="checkbox"/> I had a telehealth/video-conferencing call and they gave me advice<br><input type="checkbox"/> I attended an in-person appointment<br><input type="checkbox"/> Someone came to do a "home visit" assessment<br><input type="checkbox"/> There was an admission to hospital<br><input type="checkbox"/> Other                                                                                                                                                                                                                                                                                                                                                                              |
| Was the hospital admission                                                                                                               | <input type="checkbox"/> Public adult mental health (adults aged 18-65 years old)<br><input type="checkbox"/> Public older adults/aged/older persons mental health (adults aged > 65 years old)<br><input type="checkbox"/> Public general hospital<br><input type="checkbox"/> Private adult mental health (adults aged 18-65 years old)<br><input type="checkbox"/> Private older adults/aged/older persons mental health (adults aged > 65 years old)<br><input type="checkbox"/> Private general hospital<br><input type="checkbox"/> Other                                                                                                                                                                                                                                                        |

---

What were the outcomes of the support you received?

- ☐ Medication was recommended  
☐ Non-medication strategies were recommended such as music, distraction etc  
☐ Both medication and non-medication strategies were recommended  
☐ Other  
☐ Not sure

---

As part of trying to get support for the behaviour changes, have you heard of Dementia Support Australia (DSA)? This includes the Dementia Behaviour Management Advisory Service (DBMAS) and the Severe Behaviour Response Team (SBRT). The DSA is a 24-hour free call service that can provide support and treatment of behaviour changes focusing on non-medication strategies.

- ☐ Yes  
☐ No

---

What kind of contact, if any, have you had with Dementia Services Australia (DSA)?

- ☐ We made contact and DSA were involved with the care of the person with younger-onset dementia  
☐ We made contact but DSA did not get involved. We were told to seek support from another organisation  
☐ We made contact but DSA did not get involved. We were told that we were not appropriate for DSA  
☐ We made contact and we decided that DSA was not right for us  
☐ We looked at the DSA website/brochure but did not proceed with contacting them  
☐ We have heard of DSA through other people but have not had any contact with them

---

I have not heard of DSA but I might want to contact them in the future for support for the behaviours changes

- ☐ Yes  
☐ No  
☐ Not sure

## Satisfaction

Page 1

Please complete the survey below.

Thank you!

---

### Rate how much you agree with the statements

|                                                                                                                  | Completely disagree   | Disagree              | Neutral/Don't know    | Agree                 | Completely agree      | Not applicable        |
|------------------------------------------------------------------------------------------------------------------|-----------------------|-----------------------|-----------------------|-----------------------|-----------------------|-----------------------|
| I did not know where to start when looking for a service that was able to help me manage these behaviour changes | <input type="radio"/> |
| It was difficult to access a service which could support me in managing behaviour changes                        | <input type="radio"/> |
| The process of accessing services to help me manage behaviour changes took too long                              | <input type="radio"/> |
| It would be useful to have some guidelines for who to contact when you need help for behaviour changes           | <input type="radio"/> |

Which services provided you with support for the behaviour changes associated with younger-onset dementia?

- ☐ General practitioner (GP)
- ☐ Went to the Emergency Department
- ☐ Called an ambulance
- ☐ Private specialist (e.g private psychiatrist, private neurologist, private psychologist)
- ☐ Adult mental health team (public-funded service for adults 18-65 years old)
- ☐ Older adults/aged/older persons mental health team (public-funded service for adults > 65 years old)
- ☐ Dementia Australia
- ☐ Dementia Services Australia (DSA)/Dementia Behaviour Management Advisory Services/Severe Behaviour Response Team
- ☐ Other
- ☐ I have not needed help

**Please rate how much you agree or disagree with the following statements related to the support provided by the Emergency Department**

|                                                                                      | Completely disagree   | Disagree              | Neutral/Don't know    | Agree                 | Completely agree      | Not applicable        |
|--------------------------------------------------------------------------------------|-----------------------|-----------------------|-----------------------|-----------------------|-----------------------|-----------------------|
| It was easy to access this service                                                   | <input type="radio"/> |
| It took too long to access this service                                              | <input type="radio"/> |
| I had a positive experience with this service                                        | <input type="radio"/> |
| I found the service understood younger-onset dementia                                | <input type="radio"/> |
| I found this service understood the behaviour changes seen in younger-onset dementia | <input type="radio"/> |
| The main outcome from this service was medication for the behaviour changes          | <input type="radio"/> |
| The main outcome from this service was use of non-medications e.g., strategies       | <input type="radio"/> |
| The main outcome from this service was a combination of medications and strategies   | <input type="radio"/> |
| I was overall satisfied with the service                                             | <input type="radio"/> |
| I would use the service again                                                        | <input type="radio"/> |
| I would recommend the service to others                                              | <input type="radio"/> |

**Please rate how much you agree or disagree with the following statements related to the support provided by the private specialist**

|                                                                                               | Completely disagree   | Disagree              | Neutral/Don't know    | Agree                 | Completely agree      | Not applicable        |
|-----------------------------------------------------------------------------------------------|-----------------------|-----------------------|-----------------------|-----------------------|-----------------------|-----------------------|
| It was easy to access this service                                                            | <input type="radio"/> |
| It took too long to access this service                                                       | <input type="radio"/> |
| I had a positive experience with this service                                                 | <input type="radio"/> |
| I found the service understood younger-onset dementia                                         | <input type="radio"/> |
| I found the service understood the behaviour changes seen in younger-onset dementia           | <input type="radio"/> |
| The main outcome from this service was medications for the behaviour changes                  | <input type="radio"/> |
| The main outcome from this service was use of non-medications e.g., strategies                | <input type="radio"/> |
| The main outcome from this service was a combination of medications and strategies            | <input type="radio"/> |
| I was overall satisfied with the service                                                      | <input type="radio"/> |
| I would use the service again                                                                 | <input type="radio"/> |
| I would recommend the service to others                                                       | <input type="radio"/> |
| I found the service helpful                                                                   | <input type="radio"/> |
| The service's recommendations resulted in an improvement of the behaviour changes             | <input type="radio"/> |
| The service's recommendations helped me feel more confident in managing the behaviour changes | <input type="radio"/> |

**Please rate whether you agree or disagree with the following statements related to the support provided by the adult mental health service (public-funded service for adults 18-65 years old)**

|                                                                                                          | Completely disagree   | Disagree              | Neutral/Don't know    | Agree                 | Completely agree      | Not applicable        |
|----------------------------------------------------------------------------------------------------------|-----------------------|-----------------------|-----------------------|-----------------------|-----------------------|-----------------------|
| It was easy to access this service                                                                       | <input type="radio"/> |
| It took too long to access this service                                                                  | <input type="radio"/> |
| I had a positive experience with this service                                                            | <input type="radio"/> |
| I found the service understood younger-onset dementia                                                    | <input type="radio"/> |
| I found the service understood the behaviour changes seen in younger-onset dementia                      | <input type="radio"/> |
| The main outcome from this service was medications for the behaviour changes                             | <input type="radio"/> |
| The main outcome from this service was use of non-medications e.g., strategies                           | <input type="radio"/> |
| The main outcome from this service for a combination of medications and non-medications e.g., strategies | <input type="radio"/> |
| I was overall satisfied with the service                                                                 | <input type="radio"/> |
| I would use the service again                                                                            | <input type="radio"/> |
| I would recommend the service to others                                                                  | <input type="radio"/> |
| I found the service helpful                                                                              | <input type="radio"/> |
| The service's recommendations resulted in an improvement in the behaviour changes                        | <input type="radio"/> |
| The service's recommendations helped me feel more confident in managing the behaviour changes            | <input type="radio"/> |

**Please rate whether you agree and disagree with the following statements related to the support provided by the older adults/aged community mental health service (public-funded service for adults > 65 years old)**

|                                                                                               | Completely disagree   | Disagree              | Neutral/Don't know    | Agree                 | Completely agree      | Not applicable        |
|-----------------------------------------------------------------------------------------------|-----------------------|-----------------------|-----------------------|-----------------------|-----------------------|-----------------------|
| It was easy to access this service                                                            | <input type="radio"/> |
| I had a positive experience with this service                                                 | <input type="radio"/> |
| I found the service understood younger-onset dementia                                         | <input type="radio"/> |
| I found the service understood the behaviour changes seen in younger-onset dementia           | <input type="radio"/> |
| The main outcome from this service was medications for the behaviour changes                  | <input type="radio"/> |
| The main outcome from this service is use of non-medications e.g., strategies                 | <input type="radio"/> |
| The main outcome from this service was a combination of medications and strategies            | <input type="radio"/> |
| I was overall satisfied with the service                                                      | <input type="radio"/> |
| I would use the service again                                                                 | <input type="radio"/> |
| I would recommend the service to others                                                       | <input type="radio"/> |
| I found the service helpful                                                                   | <input type="radio"/> |
| The service's recommendations resulted in an improvement in the behaviour changes             | <input type="radio"/> |
| The service's recommendations helped me feel more confident in managing the behaviour changes | <input type="radio"/> |

**Please rate whether you agree and disagree with the following statements related to the support provided by Dementia Services Australia.**

|                                                                                               | Completely disagree   | Disagree              | Neutral/Don't know    | Agree                 | Completely agree      | Not applicable        |
|-----------------------------------------------------------------------------------------------|-----------------------|-----------------------|-----------------------|-----------------------|-----------------------|-----------------------|
| It was easy to access this service                                                            | <input type="radio"/> |
| I had a positive experience with this service                                                 | <input type="radio"/> |
| I found the service understood younger-onset dementia                                         | <input type="radio"/> |
| I found the service understood the behaviour changes seen in younger-onset dementia           | <input type="radio"/> |
| I found the service helpful                                                                   | <input type="radio"/> |
| I would use the service again                                                                 | <input type="radio"/> |
| The service's recommendations resulted in an improvement in the behaviour changes             | <input type="radio"/> |
| The service's recommendations helped me feel more confident in managing the behaviour changes | <input type="radio"/> |
| I would recommend the service to others                                                       | <input type="radio"/> |
| I was overall satisfied with the service                                                      | <input type="radio"/> |

**Please rate whether you agree and disagree with the following statements related to the support provided by your GP**

|                                                                                                     | Completely disagree   | Disagree              | Neutral/Don't know    | Agree                 | Completely agree      | Not applicable        |
|-----------------------------------------------------------------------------------------------------|-----------------------|-----------------------|-----------------------|-----------------------|-----------------------|-----------------------|
| I had a positive experience seeking support from my GP                                              | <input type="radio"/> |
| My GP had a good understanding of younger-onset dementia                                            | <input type="radio"/> |
| My GP knew how to make a referral for me to get more support for the behaviour changes              | <input type="radio"/> |
| The service my GP referred me to was appropriate for the support I needed for the behaviour changes | <input type="radio"/> |

## Other comments

Is there anything else you wish to comment on that is related to your experience of seeking or getting support to manage behaviour changes associated with younger-onset dementia?

## Supplementary results

### GP support satisfaction

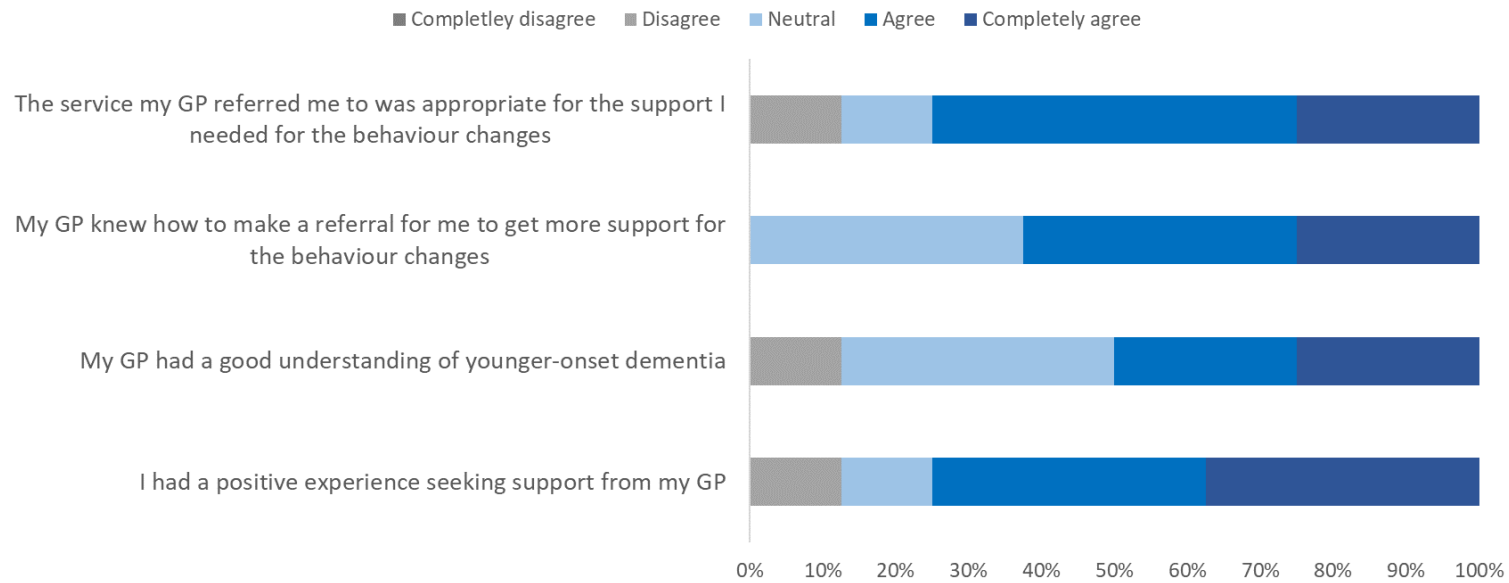

Figure S1. Satisfaction ratings for YOD-related behaviour change support provided by GP's. N = 8.



## Emergency Department satisfaction

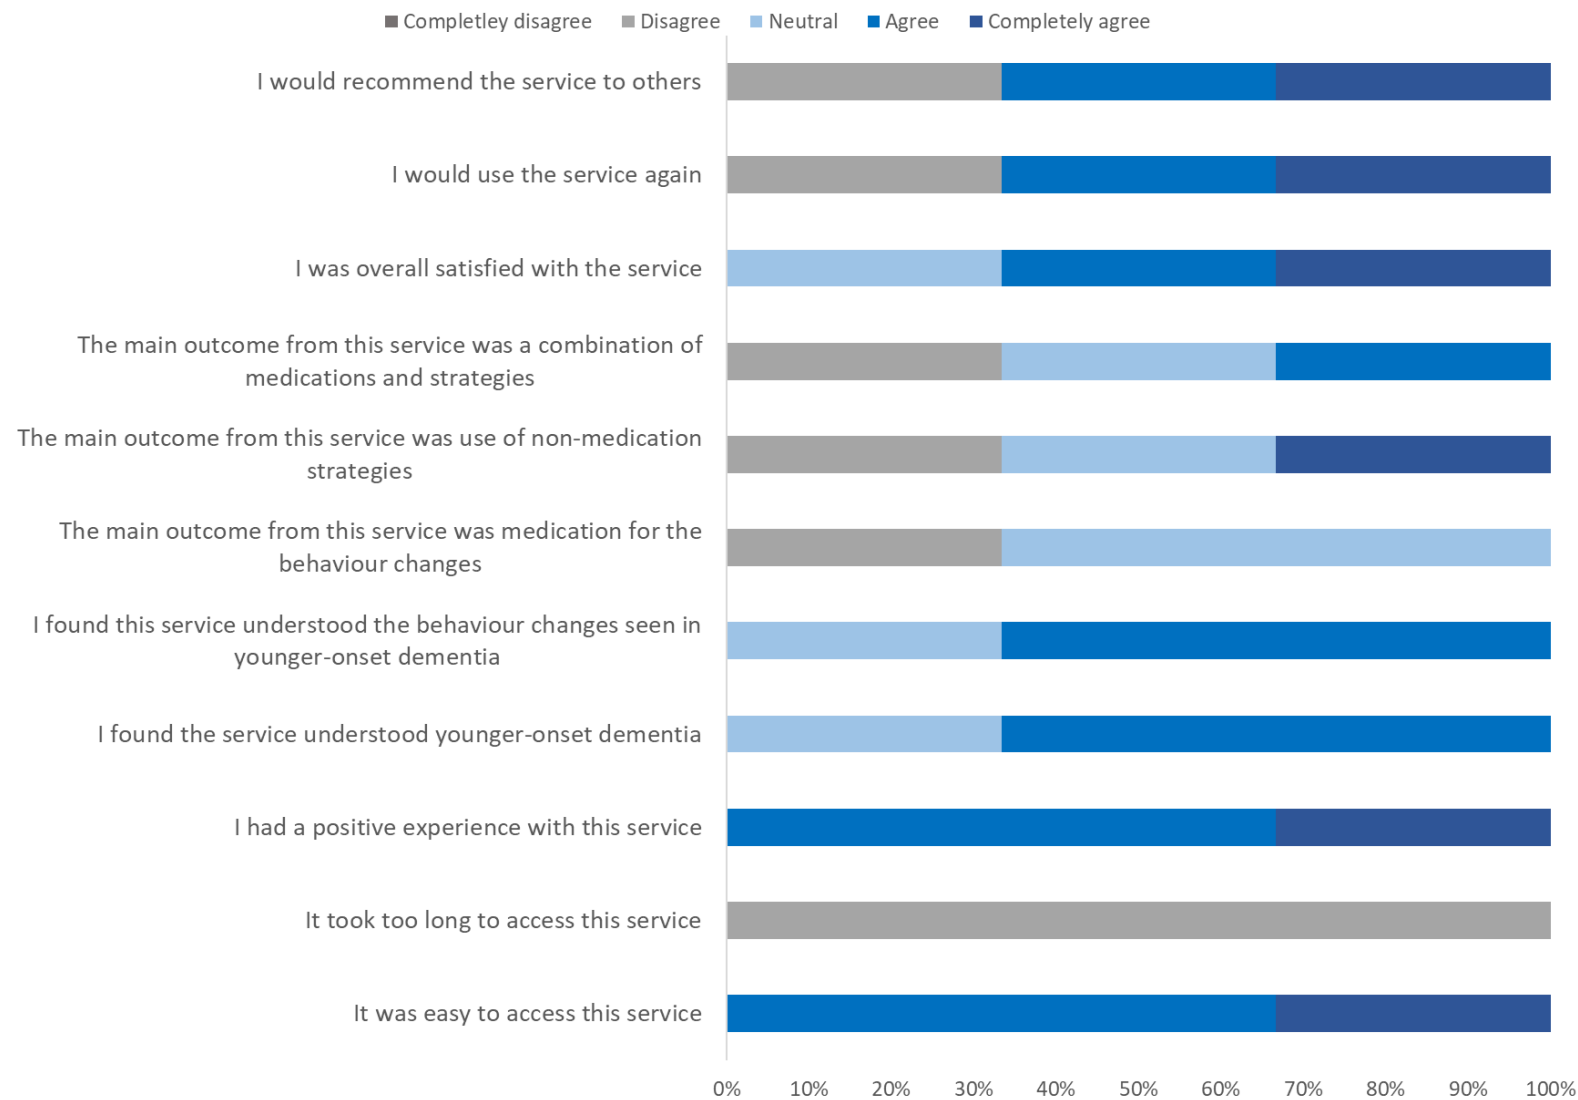

Figure S2. Satisfaction ratings for YOD-related behaviour change support provided by hospital emergency department. N = 3.

## Private specialist satisfaction

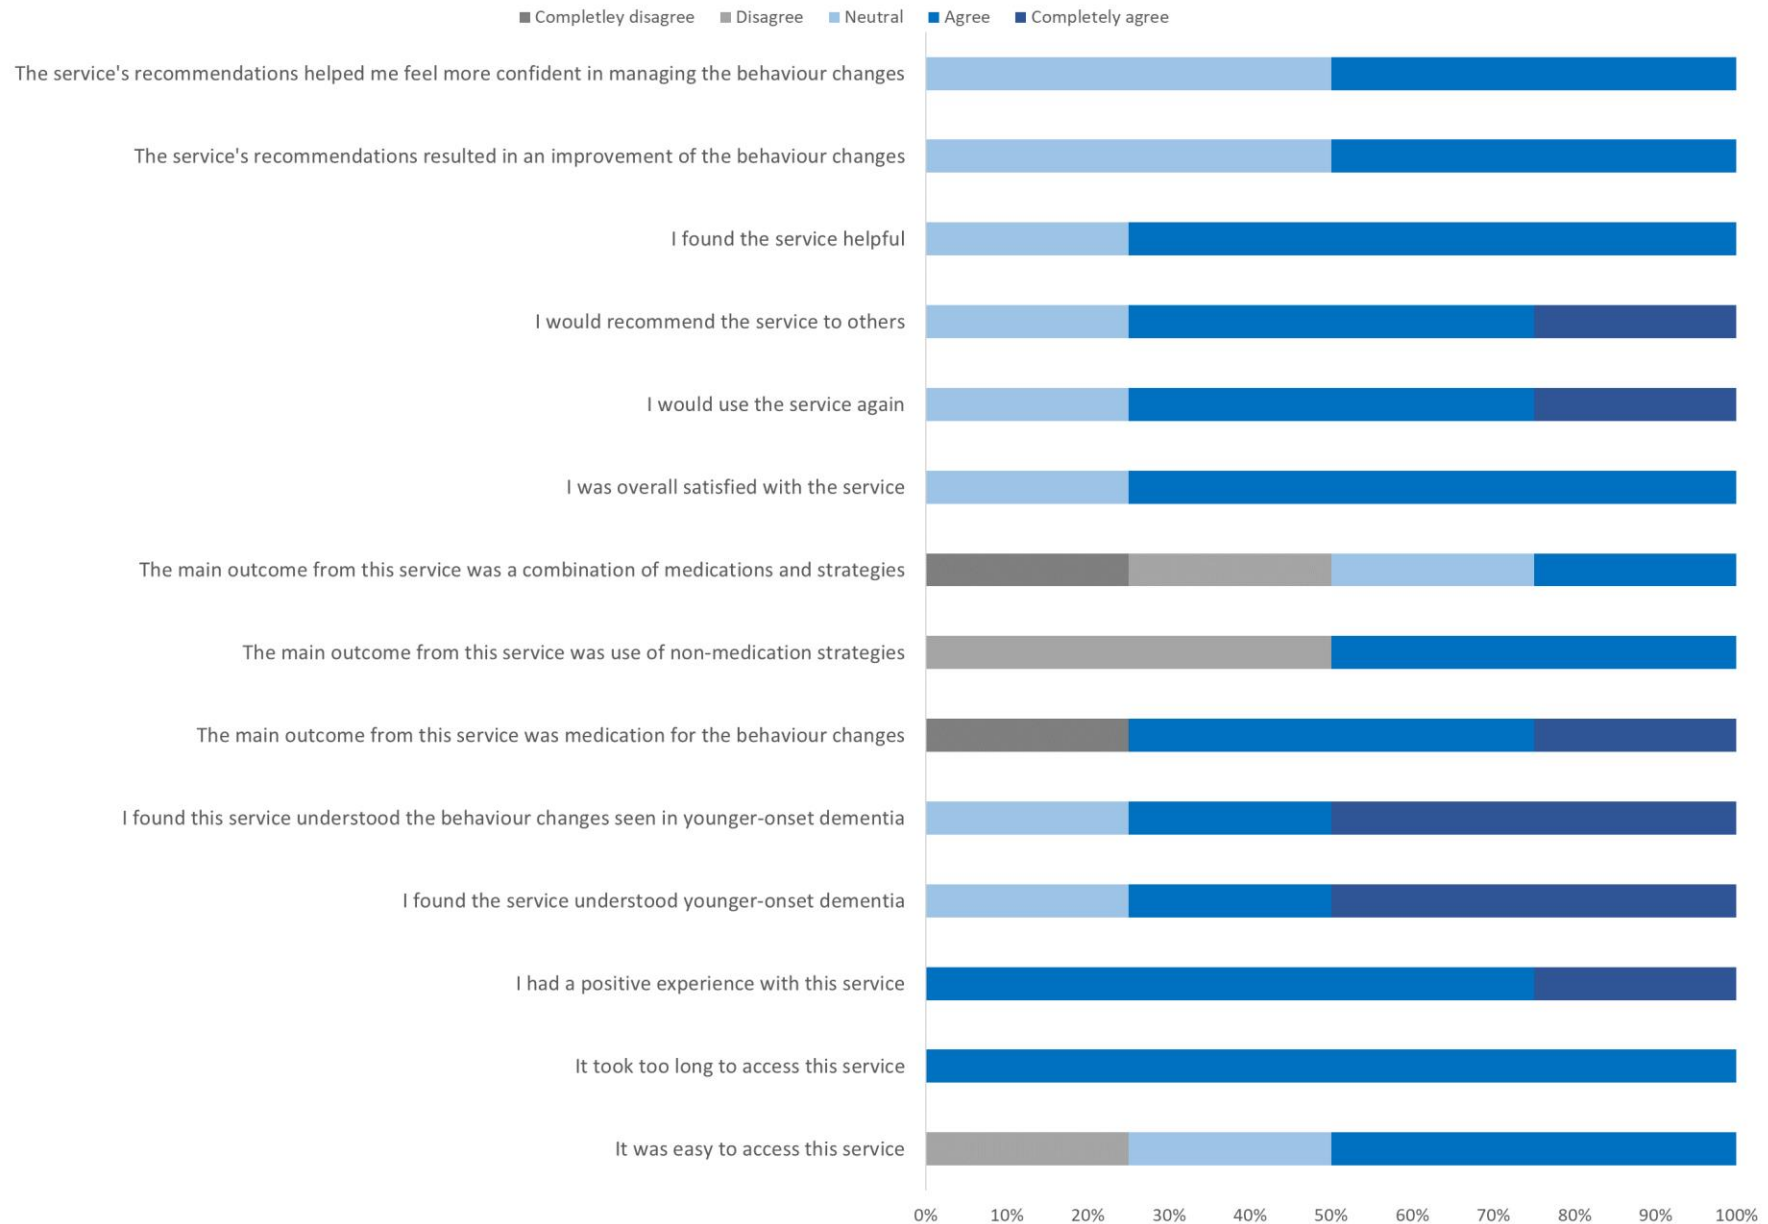

Figure S3. Satisfaction ratings for YOD-related behaviour change support provided by private specialist. N = 4.

## Adult mental health service satisfaction

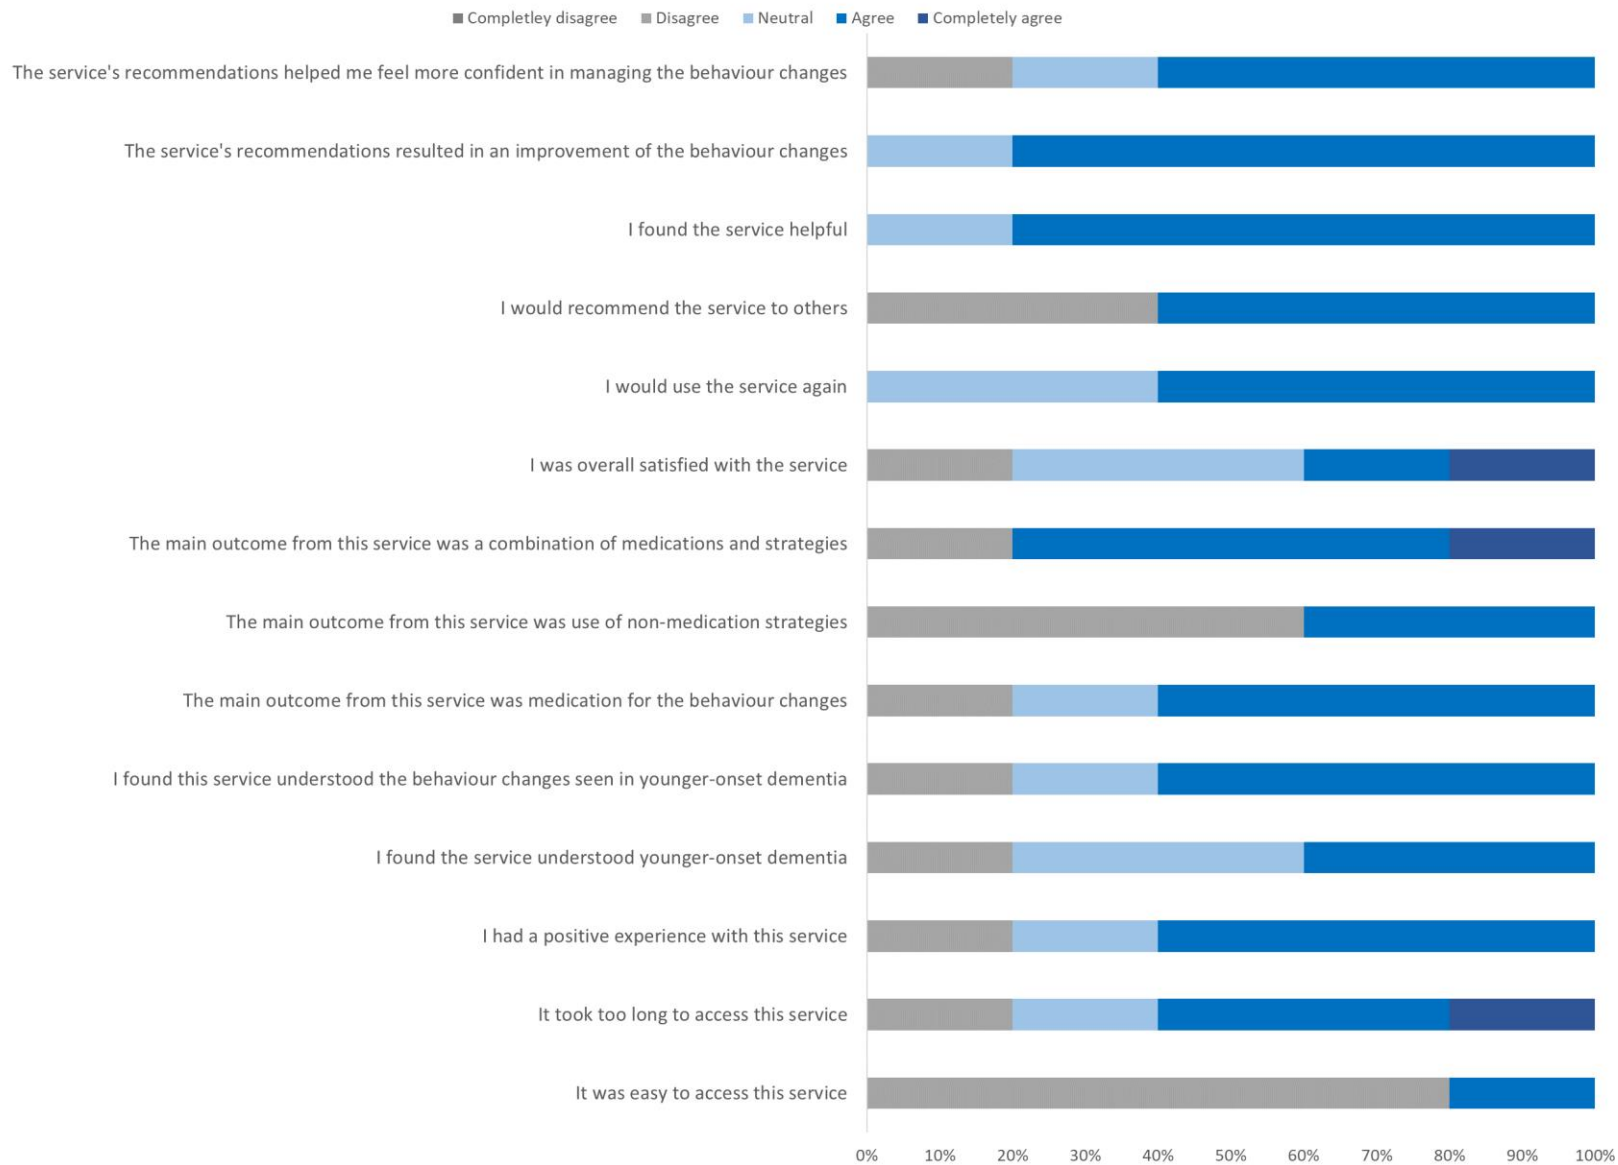

Figure S4. Satisfaction ratings for YOD-related behaviour change support provided by adult mental health service. N = 5.

## Older adult mental health service satisfaction

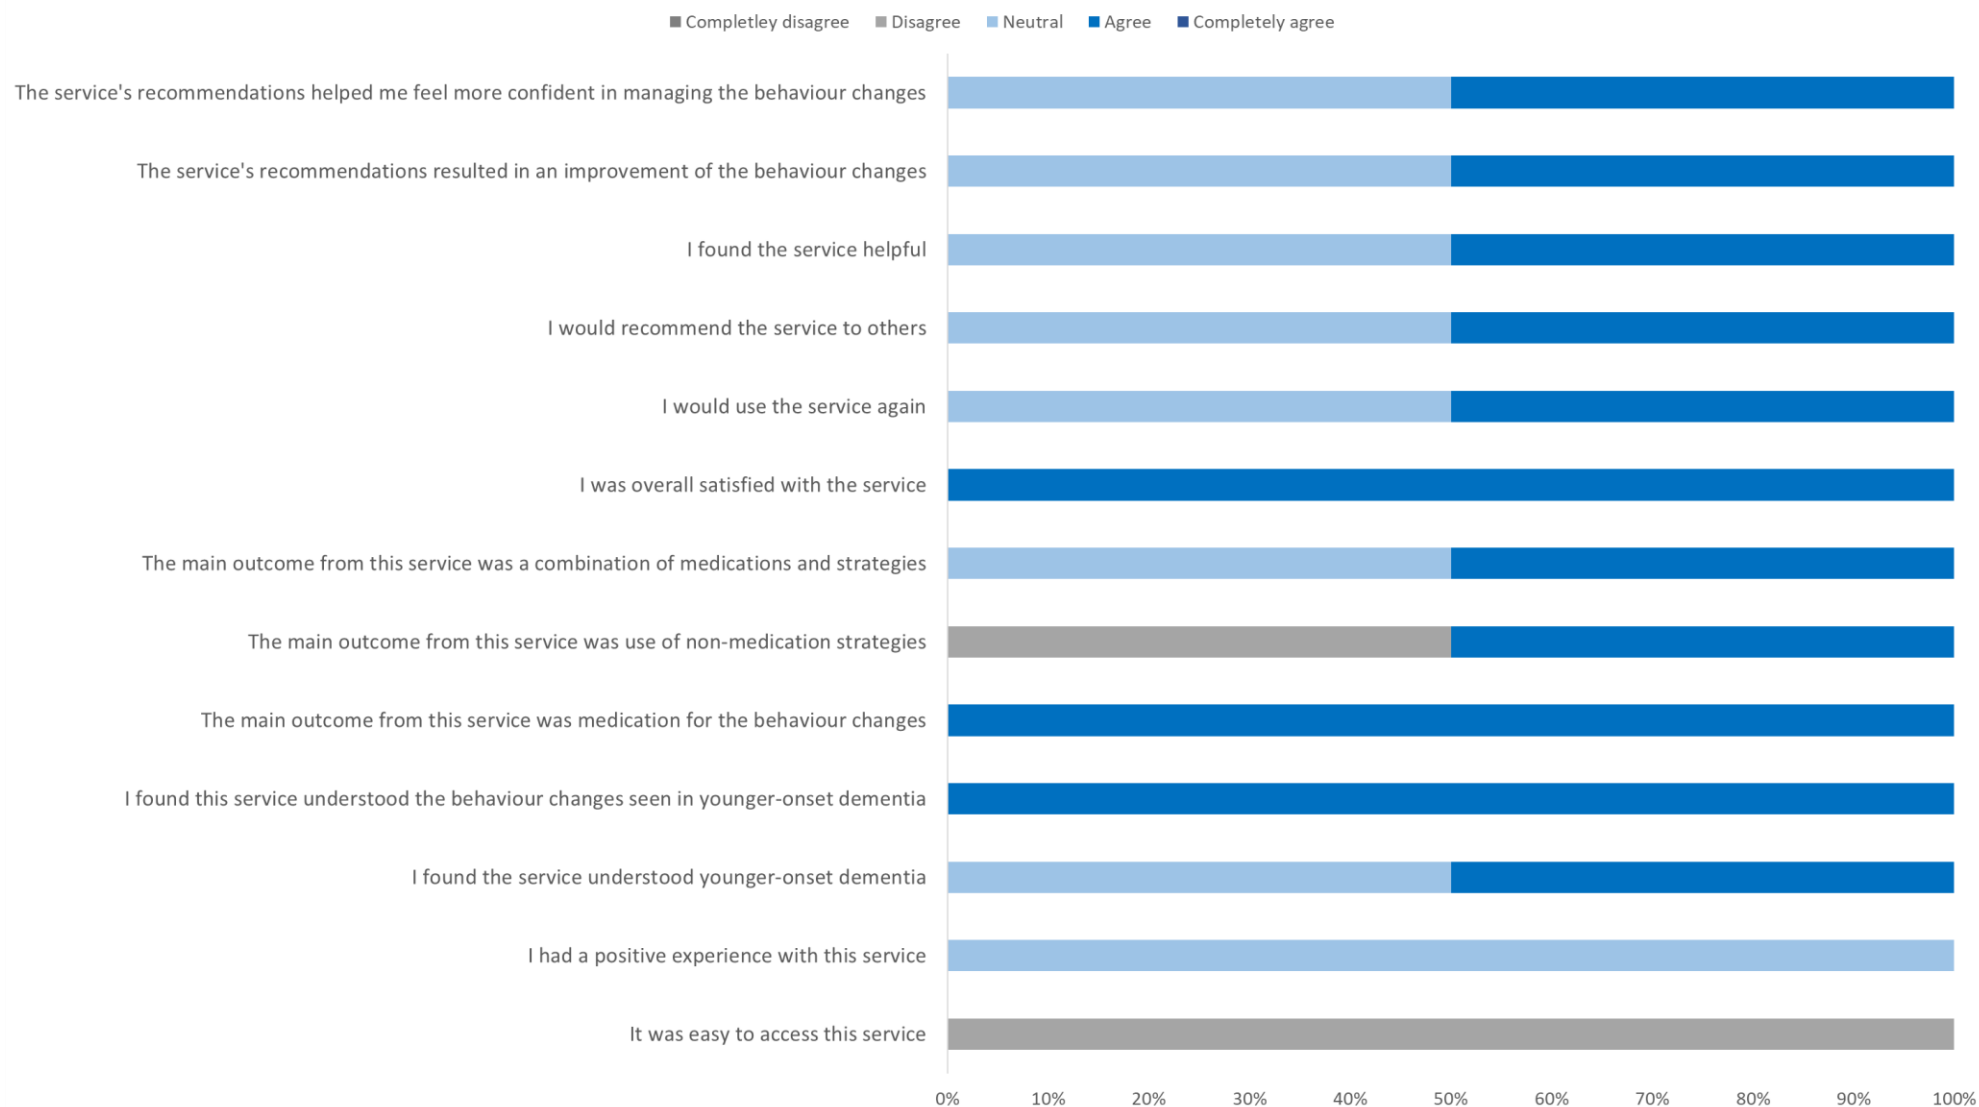

Figure S5. Satisfaction ratings for YOD-related behaviour change support provided by older adult mental health service. N = 2.

## Dementia Services Australia satisfaction

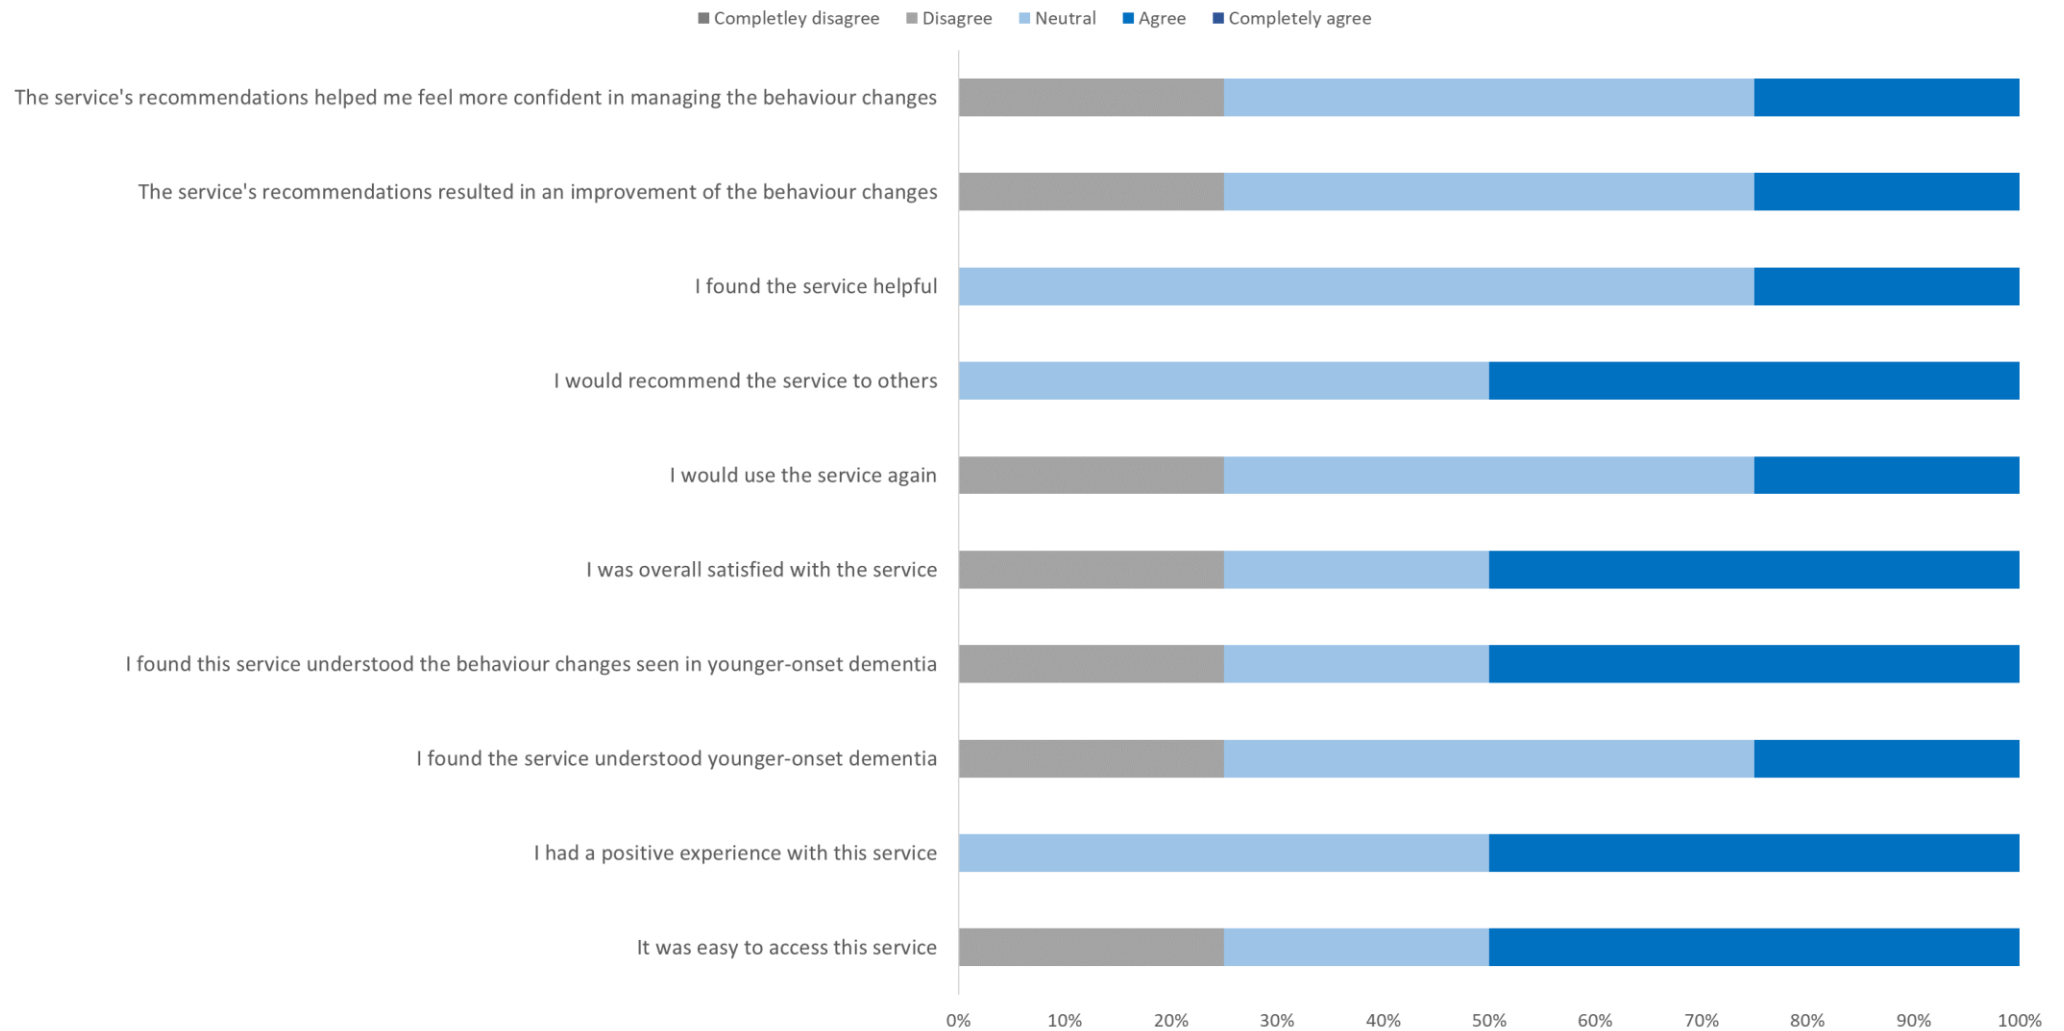

Figure S6. Satisfaction ratings for YOD-related behaviour change support provided by Dementia Services Australia. N = 4.
